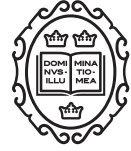

## Obesogenic Risks

# Change in body size and mortality: a systematic review and meta-analysis

Amalia Karahalios,<sup>1\*</sup> Dallas R English<sup>1,2</sup> and Julie A Simpson<sup>1</sup>

<sup>1</sup>Centre for Epidemiology and Biostatistics, University of Melbourne and <sup>2</sup>Cancer Epidemiology Centre, Cancer Council Victoria, Melbourne, VIC, Australia

\*Corresponding author. Level 3, 207 Bouverie Street, Centre for Epidemiology and Biostatistics, Melbourne School of Population and Global Health, University of Melbourne, Melbourne, VIC, Australia. E-mail: emily.karahalios@unimelb.edu.au

Accepted 4 August 2016

### Abstract

**Background:** Observational studies have reported that weight loss in later life is associated with an increased risk of mortality. However, the association with weight gain is unclear. We conducted a systematic review and meta-analysis of prospective studies assessing the association of weight gain and loss, and mortality.

**Methods:** We searched PubMed, Scopus and Web of Science for articles published before 5 September 2015. We included prospective studies that reported enough information to extract hazard ratios (HRs) with the corresponding 95% confidence intervals (CIs) for the association between weight gain and/or weight loss, and all-cause and cause-specific mortality. The estimates were pooled using a random-effects model. Meta-regression models were fitted to explore sources of potential between-study heterogeneity.

**Results:** A total of 25 (providing data from 437 772 participants with 34 038 deaths from all causes) and 24 studies (434 694 participants with 31 978 deaths) presented results for the exposures, weight loss and weight gain. Weight loss compared with a stable weight was associated with an increased risk of all-cause (pooled HR: 1.45; 95% CI: 1.34, 1.58), and cardiovascular disease (CVD) mortality (1.50; 1.32, 1.70) and a slightly increased risk of cancer mortality (1.19; 0.97, 1.46). Weight gain was associated with an increased risk of CVD mortality (1.21; 1.07, 1.36) and a slightly increased risk of all-cause mortality (1.07; 1.01, 1.13) and cancer mortality (1.04; 0.96, 1.13). Considerable heterogeneity was observed; the method used to ascertain body size and the proportion of the baseline sample included in the final analysis explained most of the heterogeneity.

**Conclusion:** Weight loss and weight gain in midlife are associated with increased risk of all-cause and CVD mortality.

**Key words:** Meta-analysis, systematic review, weight loss, weight gain, mortality, middle aged

### Key Messages

- Weight gain and weight loss are associated with increased risk of all-cause and cardiovascular disease mortality.
- Weak associations were found for weight gain and weight loss and the risk of cancer mortality.
- Future observational studies should account for weight loss intention in the analysis of weight change and mortality.

## Introduction

Weight loss, independent of underlying disease, is assumed to be beneficial because of the known increased risks associated with obesity; whereas weight gain is assumed to be detrimental to health.<sup>1</sup> With more cohort studies inviting their participants to return for follow-up waves of data collection, it is becoming increasingly common for studies to assess weight gain and/or weight loss from midlife to older age. Weight gain from midlife to older age might involve different mechanisms (e.g. decreases in muscle mass and increases in fat mass) than from early adulthood to middle age, and the latter time period might correspond to a longer duration of obesity, resulting in increased mortality.<sup>2,3</sup>

A 2009 systematic review and meta-analysis of the association between weight loss (measured by weight or body mass index (BMI)) and the risk of mortality included studies published between 1987 and 2008, and assessed weight loss both retrospectively and prospectively.<sup>4</sup> As well, it included studies assessing weight loss from early adulthood (e.g. age 18 or 21) to midlife and studies of weight loss from midlife to older age.<sup>4</sup> The review did not assess the associations between mortality and weight gain or changes in waist circumference, nor did it look at cause-specific mortality (i.e. mortality from cancer or cardiovascular disease).

In addition to updating the previous systematic review,<sup>4</sup> the aim of this review was to focus on studies that assessed the association between gain and loss of weight and/or waist circumference in healthy adults, measured between midlife and older age, and all-cause and cause-specific mortality, to quantify these associations using meta-analysis and to explore heterogeneity between the studies using meta-regression.

## Methods

### Search strategy

We searched PubMed, Scopus and Web of Science (Science Citation Index Expanded and Social Sciences Citation Index and Arts & Humanities Citation Index) to identify prospective studies published before 5 September 2015, which assessed the association between gain or loss in weight/BMI and/or waist circumference and all-cause and/or cause-specific mortality (search strategy provided in

Table S1, see [Supplementary data](#) available at *IJE* online). Next, we hand-searched the bibliographies of retrieved papers to identify additional relevant studies. We then checked the bibliographies of three review papers<sup>4–6</sup> to ensure that all studies in these reviews were included. Finally, we carried out a further search in Google Scholar of known cohort studies (Table S2, see [Supplementary data](#) available at *IJE* online); we entered the study name and the terms weight change and (death OR mortality) in the search box, and reviewed the first three pages of Google Scholar results. We did not include any unpublished studies or eligible abstracts that did not have full text available. This systematic review was planned, conducted and reported with adherence to the standards of quality for reporting meta-analyses of observational studies<sup>7</sup> (Table S3, see [Supplementary data](#) available at *IJE* online) and was registered with PROSPERO (International Prospective Register Of Systematic Reviews), reference number CRD42014015627.<sup>8</sup>

### Eligibility criteria

The inclusion criteria for studies were: (i) prospective studies; (ii) English language; (iii) middle-aged adults (i.e. age at baseline between 40 and 65 years and considered to be healthy); (iv) reported results for change in weight/BMI, and/or waist circumference ascertained at midlife and again in older age (i.e. at least 5 or more years after baseline); (v) outcome of interest was all-cause, cardiovascular disease (CVD) or cancer mortality; and (vi) the study reported enough information to extract hazard ratio (HR) estimates and the corresponding 95% confidence intervals (CIs) (note, where published data were not sufficient, we contacted the corresponding author). Data on the HR of mortality (95% CI) were extracted for all subgroups presented by the authors (e.g. men and women). If results from a single study were reported more than once, we used the most recent report.

### Data extraction

The following data were extracted: the first author's last name; year of publication; name of the study; country where the study was performed; participants' sex; mean

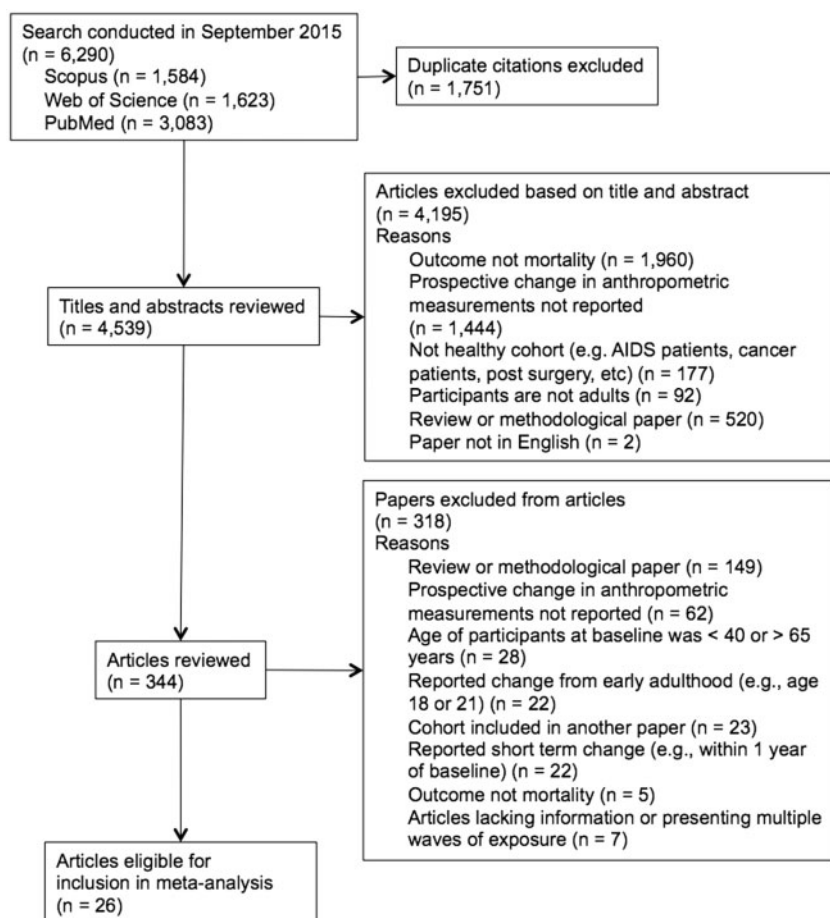

**Figure 1.** Selection of studies published up to September 2015 for inclusion in a meta-analysis of weight gain and weight loss and all-cause, cardiovascular disease and cancer mortality.

and range of participants' age at baseline; sample size at baseline; weight measure(s) recorded including details of assessment (i.e. directly measured or self-reported); weight/BMI at baseline; weight loss intention; categories of the exposure measure (if presented); number of deaths; person-years; HR and corresponding 95% CI; and potential confounders included in the analysis. We extracted HRs from the most fully adjusted model in each study. If results were reported for two multivariable models, we extracted HRs from the model that did not adjust for possible intermediaries in the causal pathway (i.e. cholesterol, dyslipidaemia, blood pressure, hypertension, insulin resistance, diabetes or cancer). Finally, the freeware software, PlotDigitizer<sup>9</sup> was used to extract HRs and 95% CIs for estimates that were only presented in a figure.

### Data analysis

A.K. reviewed the abstracts and full articles. A.K. and J.A.S. independently extracted the data from the included studies, and D.R.E. resolved any discrepancies. We

estimated, using meta-analysis with random-effects, the pooled HRs for each study's largest category of weight gain and weight loss compared with the reference category for all-cause, CVD and cancer mortality. Most studies compared weight loss and gain with a stable category that corresponded to a weight change (increase or decrease) of no more than 5 kg.

### Assessment of bias

Individual reports were assessed for their risk of bias using the domains of bias from the ROBINS-I tool obtained from [https://sites.google.com/site/riskofbiastool/home]. We visually inspected funnel plots of the study size versus standard error and performed Egger's regression asymmetry test to assess bias due to small study effects.<sup>10</sup>

Statistical heterogeneity between studies was tested with the Q statistic, and quantified with the I<sup>2</sup> statistic.<sup>11</sup> To explore sources of study heterogeneity, we fitted meta-regression models to estimate the association between the log-transformed study-specific HRs and the following pre-specified variables: participants' sex; method used to

**Table 1.** Characteristics of the 26 papers from 25 studies included in a meta-analysis of Weight/BMI Gain and Loss and All-Cause and Cause-Specific Mortality: 1992-2015

| Author year [reference]      | Study name (location)                                          | Age (years) at weight/BMI measurement/time to follow-up <sup>a</sup>                       | Body size measure (baseline mean $\pm$ SD <sup>b</sup> ) | Proportion of baseline sample included in analysis | Analysis                       | Confounders                                                                                                                                             | Study design |
|------------------------------|----------------------------------------------------------------|--------------------------------------------------------------------------------------------|----------------------------------------------------------|----------------------------------------------------|--------------------------------|---------------------------------------------------------------------------------------------------------------------------------------------------------|--------------|
| Adams 2014 <sup>37</sup>     | National Institutes of Health-AARP Diet and Health Study (USA) | Age 50, self-reported<br>Age 62 (baseline), measured<br>Mean time to follow-up: 12.5 years | Weight (NR)                                              | < 70%                                              | Cox proportional hazards model | Age at baseline, baseline BMI, height at age 18, physical activity, alcohol consumption, ethnicity, and education                                       | Cohort       |
| Albanese 2014 <sup>29</sup>  | MRC National Survey of Health and Development (UK)             | Age 43 (baseline), measured<br>Age 53, measured<br>Mean time to follow-up: 12 years        | Weight (72.5 $\pm$ 13.5 kg)                              | < 70%                                              | Cox proportional hazards model | Age, sex, weight at baseline, physical activity at baseline and follow-up, education, socio-economic position                                           | Cohort       |
| Allison 1999 <sup>38</sup>   | Framingham Heart Study (USA)                                   | Age 50 (baseline), measured<br>Age 64, measured<br>Mean time to follow-up: 8 years         | Weight (69.9 $\pm$ 13.0 kg)                              | < 70%                                              | Cox proportional hazards model | Age, sex, baseline weight, height, smoking status and baseline subscapular skinfold measurement                                                         | Cohort       |
| Breeze 2006 <sup>30</sup>    | London civil servants (UK)                                     | Age 47 (baseline), measured<br>Age 76, measured<br>Mean time to follow-up: 5 years         | Weight (24.5 $\pm$ 2.7 kg/m <sup>2</sup> )               | < 70%                                              | Cox proportional hazards model | Age, baseline BMI                                                                                                                                       | Cohort       |
| Claessens 2012 <sup>31</sup> | German construction industry (Germany)                         | Age 41 (baseline), measured<br>Age 47, measured<br>Mean time to follow-up: 17 years        | BMI (26.4 kg/m <sup>2</sup> )                            | < 70%                                              | Cox proportional hazards model | Age, smoking status, alcohol intake and nationality                                                                                                     | Cohort       |
| Diaz 2005 <sup>39</sup>      | NHANES I and II (USA)                                          | Age 44 (baseline), measured<br>Age 60, self-reported<br>Mean time to follow-up: 5 years    | BMI (25.5 kg/m <sup>2</sup> )                            | Baseline sample size not reported                  | Cox proportional hazards model | Age, sex, baseline BMI, smoking status, race and health status                                                                                          | Cohort       |
| Droyvold 2005 <sup>16</sup>  | Nord-Trøndelag Health Study (Norway)                           | Age 44 (baseline), self-reported<br>Age 55, measured<br>Mean time to follow-up: 5 years    | BMI (24.8 $\pm$ 3.5 kg/m <sup>2</sup> )                  | > 70%                                              | Cox proportional hazards model | Age, baseline BMI, smoking status, physical activity, alcohol intake, education, marital status, systolic blood pressure, and blood pressure medication | Cohort       |
| He 2014 <sup>4</sup>         | Xi'an Cohort, (China)                                          | Age 44 (baseline), measured<br>Age 61, measured<br>Mean time to follow-up: 17 years        | BMI (62.8 $\pm$ 6.9 kg)                                  | > 70%                                              | Cox proportional hazards model | Age, sex, change of smoking status from 1976 to 1994, physical activity, alcohol intake, education, occupation,                                         | Cohort       |

(Continued)

Table 1. Continued

| Author year [reference]       | Study name (location)                                         | Age (years) at weight/BMI measurement/time to follow-up <sup>a</sup>                                      | Body size measure (baseline mean $\pm$ SD <sup>a</sup> ) | Proportion of baseline sample included in analysis | Analysis                                                                                                               | Confounders                                                                                                                                                                                                                                | Study design |
|-------------------------------|---------------------------------------------------------------|-----------------------------------------------------------------------------------------------------------|----------------------------------------------------------|----------------------------------------------------|------------------------------------------------------------------------------------------------------------------------|--------------------------------------------------------------------------------------------------------------------------------------------------------------------------------------------------------------------------------------------|--------------|
| Holme 2015 <sup>17</sup>      | Oslo Study (Norway)                                           | Age 45 (baseline), measured<br>Age 73, measured<br>Mean time to follow-up: 11 years                       | BMI (26.3 $\pm$ 3.3 kg/m <sup>2</sup> )                  | < 70%                                              | Cox proportional hazards model                                                                                         | marital status, history of cardiovascular disease in 1994<br>Age, smoking status, education, use of antihypertensive medication, use of cholesterol-lowering medication, diabetes, myocardial infarction and cerebrovascular disease       | Cohort       |
| Iribarren 1995 <sup>25</sup>  | Honolulu Heart Program (USA)                                  | Age 54 (baseline), measured<br>Age 57, measured<br>Age 60, measured<br>Mean time to follow-up: 14.5 years | Weight (63.5 $\pm$ 9.2 kg)                               | > 70%                                              | Cox proportional hazards model with exposure set as the slope of weight (derived from the 3 measurements) against time | Age, average weight, smoking status, physical activity, energy intake, alcohol intake, occupation, and pre-existing disease                                                                                                                | Cohort       |
| Karahalios 2014 <sup>42</sup> | Melbourne Collaborative Cohort Study (Australia)              | Age 54 (baseline), measured<br>Age 66, measured<br>Mean time to follow-up: 8 years                        | Weight and waist circumference (72.3 $\pm$ 12.7 kg)      | < 70%                                              | Cox proportional hazards model                                                                                         | Age, sex, baseline weight/waist circumference, smoking status, physical activity, diet, country of birth, socioeconomic status, and whether the participant lived alone                                                                    | Cohort       |
| Klenk 2014 <sup>32</sup>      | Vorarlberg Health Monitoring and Prevention Program (Austria) | Age 43 (baseline), measured<br>Age 48, measured<br>Mean time to follow-up: 10 years                       | BMI (24.8 $\pm$ 3.7 kg/m <sup>2</sup> )                  | > 70%                                              | Cox proportional hazards model                                                                                         | Age, smoking status                                                                                                                                                                                                                        | Cohort       |
| Lee 1992 <sup>40</sup>        | Harvard University Alumni (USA)                               | Age 46 (baseline), self-reported<br>Age 58, self-reported<br>Mean time to follow-up: 11 years             | Weight (78.3 $\pm$ 9.4 kg)                               | < 70%                                              | Cox proportional hazards model                                                                                         | Age, height, smoking status and physical activity at follow-up                                                                                                                                                                             | Cohort       |
| Lee 2011 <sup>18</sup>        | Aerobics Center Longitudinal Study (USA)                      | Age 44 (baseline), measured<br>Age 50, measured<br>Mean time to follow-up: 11.4 years                     | BMI (83.3 $\pm$ 12.8 kg)                                 | > 70%                                              | Cox proportional hazards model                                                                                         | Age, BMI, smoking status, physical activity, alcohol intake, year of examination, parental cardiovascular disease, maximal metabolic equivalents at baseline, number of clinic visits between the baseline and last examinations, abnormal | Cohort       |

(Continued)

**Table 1.** Continued

| Author year [reference]       | Study name (location)                                      | Age (years) at weight/BMI measurement/time to follow-up <sup>a</sup>                         | Body size measure (baseline mean $\pm$ SD <sup>a</sup> ) | Proportion of baseline sample included in analysis | Analysis                       | Confounders                                                                                                                                                                                                             | Study design |
|-------------------------------|------------------------------------------------------------|----------------------------------------------------------------------------------------------|----------------------------------------------------------|----------------------------------------------------|--------------------------------|-------------------------------------------------------------------------------------------------------------------------------------------------------------------------------------------------------------------------|--------------|
| Myers 2011 <sup>22</sup>      | Veterans Exercise Testing Study (USA)                      | Age 59 (baseline), measured<br>Age 66, measured<br>Mean time to follow-up: 7 years           | Weight (91 $\pm$ 17.3 kg)                                | < 70%                                              | Cox proportional hazards model | echocardiogram, hypertension, diabetes, hypercholesterolaemia at the baseline and last examinations, and changes in maximal metabolic equivalents<br>Age, baseline weight, exercise capacity and cardiovascular disease | Cohort       |
| Nanri 2010 <sup>19</sup>      | Japan Public Health Center-Based Prospective Study (Japan) | Age 57 (baseline), self-reported<br>Age 62, self-reported<br>Mean time to follow-up: 9 years | Weight (58.3 $\pm$ 8.0 kg)                               | > 70%                                              | Cox proportional hazards model | Age, baseline BMI, smoking status, leisure-time physical activity, alcohol consumption, study area, history of hypertension and history of diabetes mellitus                                                            | Cohort       |
| Nilsson 2002 <sup>23</sup>    | Malmo Preventive Project (Sweden)                          | Age 47 (baseline), measured<br>Age 53, measured<br>Mean time to follow-up: 14 years          | BMI (77.1 $\pm$ 7.4 kg/m <sup>2</sup> )                  | < 70%                                              | Cox proportional hazards model | Age                                                                                                                                                                                                                     | Cohort       |
| Ostergaard 2010 <sup>33</sup> | Copenhagen City Heart Study (Denmark)                      | Age 56 (baseline), measured<br>Age 61, measured<br>Mean time to follow-up: NR                | BMI (median: 27.5 kg/m <sup>2</sup> )                    | < 70%                                              | Cox proportional hazards model | Age, sex, initial BMI, smoking status, pack-years smoked, alcohol intake, education, marital status, time between two examinations and time since second examination                                                    | Cohort       |
| Peters 1995 <sup>26</sup>     | Seven Countries Study (Europe)                             | Age 59 (baseline), measured<br>Age 69, measured<br>Mean time to follow-up: 12 years          | Weight (NR)                                              | Baseline sample size not reported                  | Cox proportional hazards model | Age, body weight at third examination, smoking status and geographical region                                                                                                                                           | Cohort       |
| Rzehak 2007 <sup>34</sup>     | Erfurt Male Cohort Study (Germany)                         | Age 48 (baseline), measured<br>Age 63, measured<br>Mean time to follow-up: 15 years          | Weight (26.4 $\pm$ 2.6 kg/m <sup>2</sup> )               | < 70%                                              | Cox proportional hazards model | Age, smoking status, education and pre-existing disease                                                                                                                                                                 | Cohort       |

(Continued)

Table 1. Continued

| Author year [reference]        | Study name (location)                         | Age (years) at weight/BMI measurement/time to follow-up <sup>a</sup>                                             | Body size measure (baseline mean $\pm$ SD <sup>a</sup> ) | Proportion of baseline sample included in analysis | Analysis                       | Confounders                                                                                                                                                               | Study design |
|--------------------------------|-----------------------------------------------|------------------------------------------------------------------------------------------------------------------|----------------------------------------------------------|----------------------------------------------------|--------------------------------|---------------------------------------------------------------------------------------------------------------------------------------------------------------------------|--------------|
| Strandberg 2013 <sup>35</sup>  | Helsinki Businessmen Study (Finland)          | Age 47 (baseline), measured<br>Age 73, self-reported<br>Mean time to follow-up: 12 years                         | Weight (81.0 kg)                                         | < 70%                                              | Cox proportional hazards model | Age, smoking at baseline and self-rated health at baseline                                                                                                                | Cohort       |
| Taing 2012 <sup>41</sup>       | Women's Health Initiative (USA)               | Age 50, self-reported<br>Age 63 (baseline), measured<br>Mean time to follow-up: 7 years                          | BMI (30.5 $\pm$ 5.1 kg/m <sup>2</sup> )                  | < 70%                                              | Cox proportional hazards model | Age, BMI, smoking status, physical activity, alcohol intake, ethnicity, education, income, hormone replacement therapy                                                    | Cohort       |
| Wannamethee 2002 <sup>36</sup> | British Regional Heart Study (UK)             | Age 50 (baseline), measured<br>Age 55, self-reported<br>Age 63, self-reported<br>Mean time to follow-up: 8 years | BMI (25.5 kg/m <sup>2</sup> )                            | > 70%                                              | Cox proportional hazards model | Age, baseline BMI, smoking status, physical activity, social class                                                                                                        | Cohort       |
| Wilsaard 2009 <sup>27</sup>    | Tromso Study (Norway)                         | Age 41 (baseline), measured<br>Age 51, measured<br>Mean time to follow-up: 10 years                              | BMI (24.2 $\pm$ 2.6 kg/m <sup>2</sup> )                  | < 70%                                              | Cox proportional hazards model | Age, baseline BMI, smoking status, and physical activity                                                                                                                  | Cohort       |
| Yaari 1998 <sup>20</sup>       | Israeli Ischemic Heart Disease Study (Israel) | Age 49 (baseline), measured<br>Age 54, measured<br>Mean time to follow-up: 18 years                              | Weight (71.3 $\pm$ 10.3 kg)                              | > 70%                                              | Cox proportional hazards model | Age, baseline BMI, smoking status, serum total cholesterol, systolic blood pressure, diabetes, cancer, definite angina, intermittent claudication, myocardial infarction, | Cohort       |

(Continued)

**Table 1. Continued**

| Author year [reference]  | Study name (location)                    | Age (years) at weight/BMI measurement/time to follow-up <sup>a</sup>                                     | Body size measure (baseline mean $\pm$ SD <sup>a</sup> ) | Proportion of baseline sample included in analysis | Analysis                       | Confounders                                                                                                                                                                                                                                                                                                                                                                                          | Study design |
|--------------------------|------------------------------------------|----------------------------------------------------------------------------------------------------------|----------------------------------------------------------|----------------------------------------------------|--------------------------------|------------------------------------------------------------------------------------------------------------------------------------------------------------------------------------------------------------------------------------------------------------------------------------------------------------------------------------------------------------------------------------------------------|--------------|
| Zhang 2014 <sup>21</sup> | Aerobics Center Longitudinal Study (USA) | Age 44 (baseline), measured<br>Age 72 (approximately),<br>measured<br>Mean time to follow-up: 12.5 years | BMI (83.5 $\pm$ 12.2 kg)                                 | < 70%                                              | Cox proportional hazards model | history of chronic lung disease, being on a diet in 1963<br>Age, BMI, smoking status, physical activity, alcohol intake, year of examination, parental cardiovascular disease, maximal metabolic equivalents at baseline, number of clinic visits between the baseline and last examinations, abnormal echocardiogram, hypertension, diabetes, and hypercholesterolemia, and changes in maximal METs | Cohort       |

All cohort studies were community-based.

EPIC, European Prospective Investigation into Cancer; MRFFIT, Multiple Risk Factor Intervention Trial; NHANES, National Health and Nutrition Examination Survey; NIH-AARP, National Institutes of Health - American Association of Retired Persons; NR, not reported.

<sup>a</sup>Mean  $\pm$  standard deviation reported unless stated otherwise.



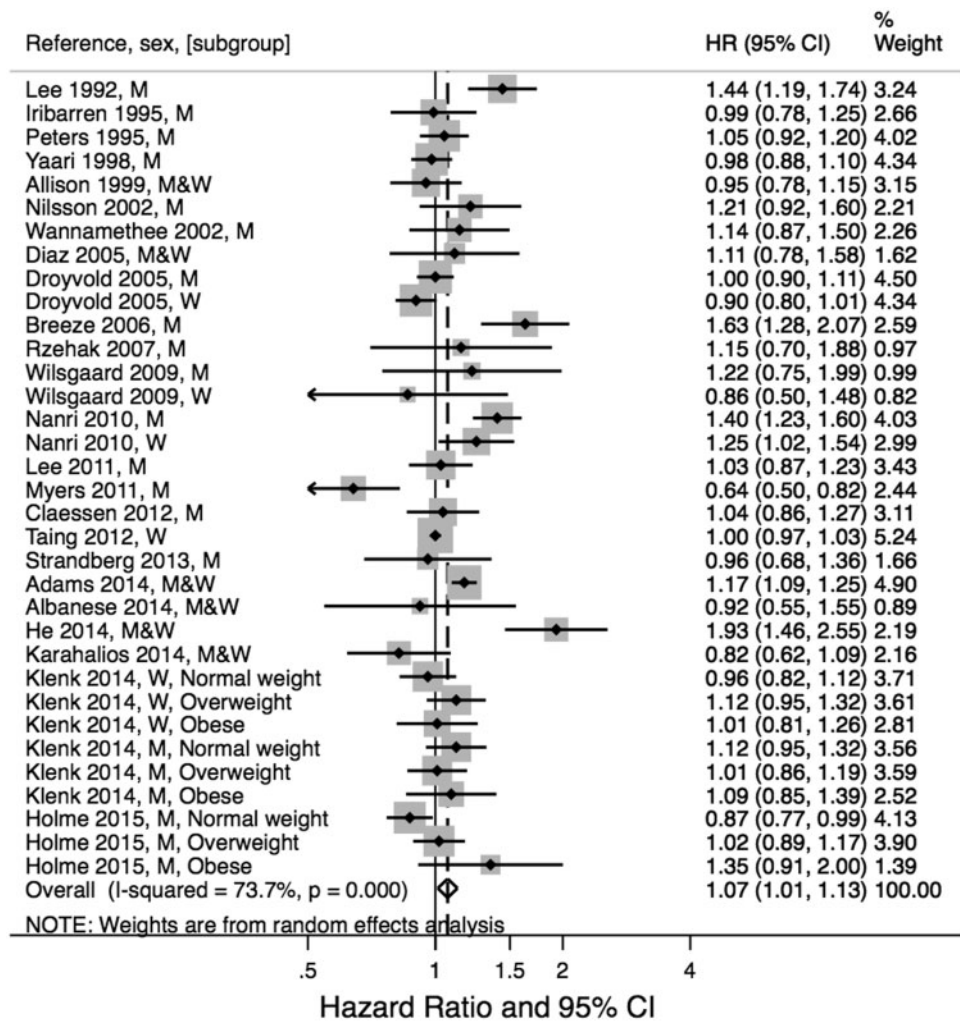

**Figure 2.** Adjusted hazard ratio for the risk of all-cause mortality comparing the largest weight gain group to the reference group for males (M), females (W) and both sexes combined, 1992 to 2015; dashed line, overall estimate; bars, 95% confidence interval (CI).

measure weight (i.e. measured or self-reported); study design; intentionality of weight loss; whether physical activity was adjusted for in the analysis; and the proportion of the baseline sample included in the analysis. Based on comments from reviewers, we also included time between measures of body size and follow-up time (both categorized as  $\leq 10$  or  $> 10$  years) as covariates in our meta-regression model.

### Nonlinear dose-response analysis

We also assessed a potential nonlinear relationship between weight change and all-cause mortality.<sup>12</sup> Weight change was modelled using restricted cubic splines with three knots at fixed percentiles (25%, 50% and 75%) of the distribution.<sup>13</sup> Restricted cubic spline models were initially computed for each study, taking into account the within-study correlation. Next, a random-effects meta-analysis was performed using

the regression coefficients and the variance-covariance matrix from each individual study.<sup>14</sup> Nonlinearity of the dose response curve was assessed by testing the null hypothesis that the coefficient of the second spline was equal to 0.

For this analysis, we excluded papers that reported percentage change because we were unable to convert these to a change in kilograms. For the remaining papers, we used the median/mean values for each category of weight change when presented. When they were not presented, we assigned the midpoint of the cut-points of the category as the dose value. In the example of a weight gain category of 5 kg to 10 kg, the assumed weight gain in this group is 7.5 kg. Using the method described by Il'yasova *et al.*<sup>15</sup> for the largest weight gain category, we assigned the value of its lower bound plus the width of the previous (second-to-highest) interval; and for the largest weight loss category, we assigned the value of its

**Table 2.** Results from meta-regression analyses of weight gain compared with a no-weight-change group and risk of all-cause mortality

| Covariate                                                   | No. of HRs<br>(no. of studies) <sup>a</sup> | Summary HR        | I <sup>2</sup> (%) | tau <sup>2</sup> | Ratio of HRs      | P-value |
|-------------------------------------------------------------|---------------------------------------------|-------------------|--------------------|------------------|-------------------|---------|
| Model with no covariates                                    | 34 (24)                                     | 1.07 (1.00, 1.15) | 73.7               | 0.024            | –                 | –       |
| Sex                                                         |                                             |                   |                    |                  |                   |         |
| Men and women                                               | 6 (6)                                       | 1.12 (0.94, 1.34) | 70.8               | 0.025            | 1.00              | –       |
| Men                                                         | 21 (17)                                     | 1.08 (0.99, 1.18) | –                  | –                | 0.97 (0.79, 1.18) | 0.717   |
| Women                                                       | 7 (5)                                       | 1.02 (0.88, 1.18) | –                  | –                | 0.91 (0.72, 1.14) | 0.402   |
| Adjusted for physical activity                              |                                             |                   |                    |                  |                   |         |
| No                                                          | 18 (11)                                     | 1.06 (0.97, 1.17) | 74.5               | 0.025            | 1.00              | –       |
| Yes                                                         | 16 (13)                                     | 1.08 (0.98, 1.20) | –                  | –                | 1.02 (0.89, 1.17) | 0.765   |
| Body size at baseline                                       |                                             |                   |                    |                  |                   |         |
| Normal weight,<br>overweight and obese                      | 26 (22)                                     | 1.09 (1.01, 1.18) | 71.8               | 0.025            | 1.00              | –       |
| Normal weight only                                          | 4 (3)                                       | 1.01 (0.84, 1.23) | –                  | –                | 0.93 (0.76, 1.14) | 0.472   |
| Overweight/obese only                                       | 4 (3)                                       | 1.02 (0.85, 1.24) | –                  | –                | 0.94 (0.77, 1.15) | 0.531   |
| Method used to collect<br>weight/BMI at each wave           |                                             |                   |                    |                  |                   |         |
| Measured at baseline<br>and follow-up wave(s)               | 27 (18)                                     | 1.04 (0.97, 1.12) | 64.4               | 0.016            | 1.00              | –       |
| Measured at baseline,<br>self-reported at follow-up wave(s) | 4 (4)                                       | 1.04 (0.86, 1.25) | –                  | –                | 1.00 (0.82, 1.22) | 0.987   |
| Self-reported at baseline<br>and follow-up wave(s)          | 3 (2)                                       | 1.37 (1.13, 1.66) | –                  | –                | 1.31 (1.07, 1.61) | 0.011   |
| Proportion of baseline sample<br>included in final analysis |                                             |                   |                    |                  |                   |         |
| < 70%                                                       | 24 (16)                                     | 1.05 (0.97, 1.14) | 74.2               | 0.025            | 1.00              | –       |
| ≥ 70%                                                       | 10 (8)                                      | 1.11 (0.99, 1.25) | –                  | –                | 1.06 (0.92, 1.23) | 0.410   |
| Exposure time                                               |                                             |                   |                    |                  |                   |         |
| ≤ 10 years                                                  | 22 (14)                                     | 1.04 (0.96, 1.13) | 74.5               | 0.024            | 1.00              | –       |
| > 10 years                                                  | 12 (10)                                     | 1.13 (1.01, 1.26) | –                  | –                | 1.08 (0.94, 1.25) | 0.251   |
| Follow-up time <sup>b</sup>                                 |                                             |                   |                    |                  |                   |         |
| ≤ 10 years                                                  | 19 (11)                                     | 1.05 (0.96, 1.15) | 73.6               | 0.025            | 1.00              | –       |
| > 10 years                                                  | 14 (12)                                     | 1.10 (0.99, 1.23) | –                  | –                | 1.05 (0.91, 1.21) | 0.457   |

No., number.

<sup>a</sup>Number of studies sum to more than the total because some studies presented separate results for men and women and/or body weight categories.

<sup>b</sup>One study did not report follow-up time.

upper bound plus half the width of the next (second-to-lowest) interval.

### Sensitivity analyses

Six studies<sup>16–21</sup> presented results adjusting for possible intermediates on the causal pathway. Two studies did not adjust for smoking status in their analysis.<sup>22, 23</sup> An additional study included participants who could be deemed to be unhealthy; Myers *et al.* 2011<sup>22</sup> included men who were referred for exercise testing. Two studies were based in Asia and had baseline weight/BMI distributions that were lower than many of the other studies.<sup>19,24</sup> We conducted separate sensitivity analyses excluding the

above-mentioned studies. Five papers<sup>16,19,20,25,26</sup> presented additional estimates after excluding deaths that occurred in the first 2 to 6 years of follow-up from the analysis; we conducted an additional sensitivity analysis pooling the results from these studies.

The estimates that we extracted from each study did not distinguish between intentional and unintentional weight loss; however, two studies<sup>20,27</sup> provided additional estimates in their papers for intentional weight loss. We conducted a sensitivity analysis to estimate the association between intentional weight loss and the risk of all-cause mortality by pooling the estimates from these studies using random-effects meta-analysis. All analyses were performed using Stata version 13.1.<sup>28</sup>

**Table 3.** Results from meta-regression analyses of weight gain compared with a no-weight-change group and risk of cardiovascular disease mortality

| Covariate                                                   | No. of HRs<br>(no. of studies) <sup>a</sup> | Summary HR        | I <sup>2</sup> (%) | tau <sup>2</sup> | Ratio of HRs      | P-value |
|-------------------------------------------------------------|---------------------------------------------|-------------------|--------------------|------------------|-------------------|---------|
| Model with no covariates                                    | 16 (14)                                     | 1.22 (1.04, 1.42) | 64.4               | 0.043            | –                 | –       |
| Sex                                                         |                                             |                   |                    |                  |                   |         |
| Men and women                                               | 4 (4)                                       | 1.36 (0.94, 1.96) | 66.9               | 0.054            | 1.00              | –       |
| Men                                                         | 10 (10)                                     | 1.18 (0.96, 1.44) | –                  | –                | 0.87 (0.57, 1.31) | 0.468   |
| Women                                                       | 2 (2)                                       | 1.24 (0.79, 1.96) | –                  | –                | 0.91 (0.51, 1.64) | 0.743   |
| Adjusted for physical activity                              |                                             |                   |                    |                  |                   |         |
| No                                                          | 4 (4)                                       | 1.17 (0.85, 1.59) | 65.8               | 0.049            | 1.00              | –       |
| Yes                                                         | 12 (10)                                     | 1.24 (1.03, 1.49) | –                  | –                | 1.06 (0.74, 1.52) | 0.733   |
| Body size at baseline                                       |                                             |                   |                    |                  |                   |         |
| All weights                                                 | 16 (14)                                     | 1.22 (1.04, 1.42) | –                  | –                | 1.00              | –       |
| Method used to collect<br>weight/BMI at each wave           |                                             |                   |                    |                  |                   |         |
| Measured at baseline<br>and follow-up wave(s)               | 11 (10)                                     | 1.14 (0.97, 1.35) | 58.2               | 0.029            | 1.00              | –       |
| Measured at baseline,<br>self-reported at follow-up wave(s) | 2 (2)                                       | 1.11 (0.72, 1.71) | –                  | –                | 0.97 (0.61, 1.54) | 0.887   |
| Self-reported at baseline<br>and follow-up wave(s)          | 3 (2)                                       | 1.61 (1.14, 2.26) | –                  | –                | 1.41 (0.97, 2.05) | 0.072   |
| Proportion of baseline sample<br>included in final analysis |                                             |                   |                    |                  |                   |         |
| < 70%                                                       | 6 (6)                                       | 1.31 (0.99, 1.74) | 62.0               | 0.041            | 1.00              | –       |
| >= 70%                                                      | 10 (8)                                      | 1.17 (0.97, 1.41) | –                  | –                | 0.89 (0.64, 1.25) | 0.477   |
| Exposure time                                               |                                             |                   |                    |                  |                   |         |
| <= 10 years                                                 | 9 (7)                                       | 1.07 (0.92, 1.24) | 49.6               | 0.018            | 1.00              | –       |
| > 10 years                                                  | 7 (7)                                       | 1.46 (1.19, 1.79) | –                  | –                | 1.36 (1.06, 1.75) | 0.019   |
| Follow-up <sup>b</sup>                                      |                                             |                   |                    |                  |                   |         |
| <= 10 years                                                 | 10 (8)                                      | 1.19 (0.97, 1.46) | 66.7               | 0.052            | 1.00              | –       |
| > 10 years                                                  | 6 (6)                                       | 1.27 (0.99, 1.63) | –                  | –                | 1.07 (0.78, 1.48) | 0.650   |

<sup>a</sup>Number of studies sum to more than the total because some studies presented separate results for men and women and/or body weight categories.

<sup>b</sup>Two studies did not report follow-up time.

## Results

### Study selection

The keyword search identified 6290 articles; 1751 duplicate citations were removed and an additional 4,195 articles were excluded based on their title and abstract, leaving 344 articles for further evaluation. Of these, 318 articles were excluded, leaving 26 articles appropriate for the systematic review and meta-analysis. The reasons for excluding articles are shown in [Figure 1](#); 49% were review papers or commentaries and 20% did not report on weight gain or weight loss.

### Study characteristics

[Table 1](#) summarizes the 26 papers (from 25 studies) eligible for the meta-analysis. Thirteen studies were

conducted in Europe,<sup>16,17,23,26,27,29–36</sup> nine papers (from eight studies) were conducted in the USA,<sup>18,21,22,25,37–41</sup> two in Asia,<sup>19,24</sup> one in Australia<sup>42</sup> and one in the Middle East.<sup>20</sup> Four studies measured weight at baseline and used self-reported measures at the follow-up wave(s),<sup>35,36,39,41</sup> two used self-reported measures of weight at the baseline and follow-up wave(s) of data collection<sup>19,40</sup> and the remaining 19 studies (20 papers)<sup>16–18,20–27,29–34,37,38,42</sup> measured weight at all wave(s). [Tables S4, S5 and S6](#) (see [Supplementary data](#) available at *IJE* online) provide details for all-cause, CVD and cancer mortality for each study and the estimates and corresponding 95% CIs extracted for each weight change category. Of the 33 papers eligible for inclusion in the meta-analysis, seven papers did not provide sufficient information to be included in the meta-analysis or reported on weight/BMI measured repeatedly.

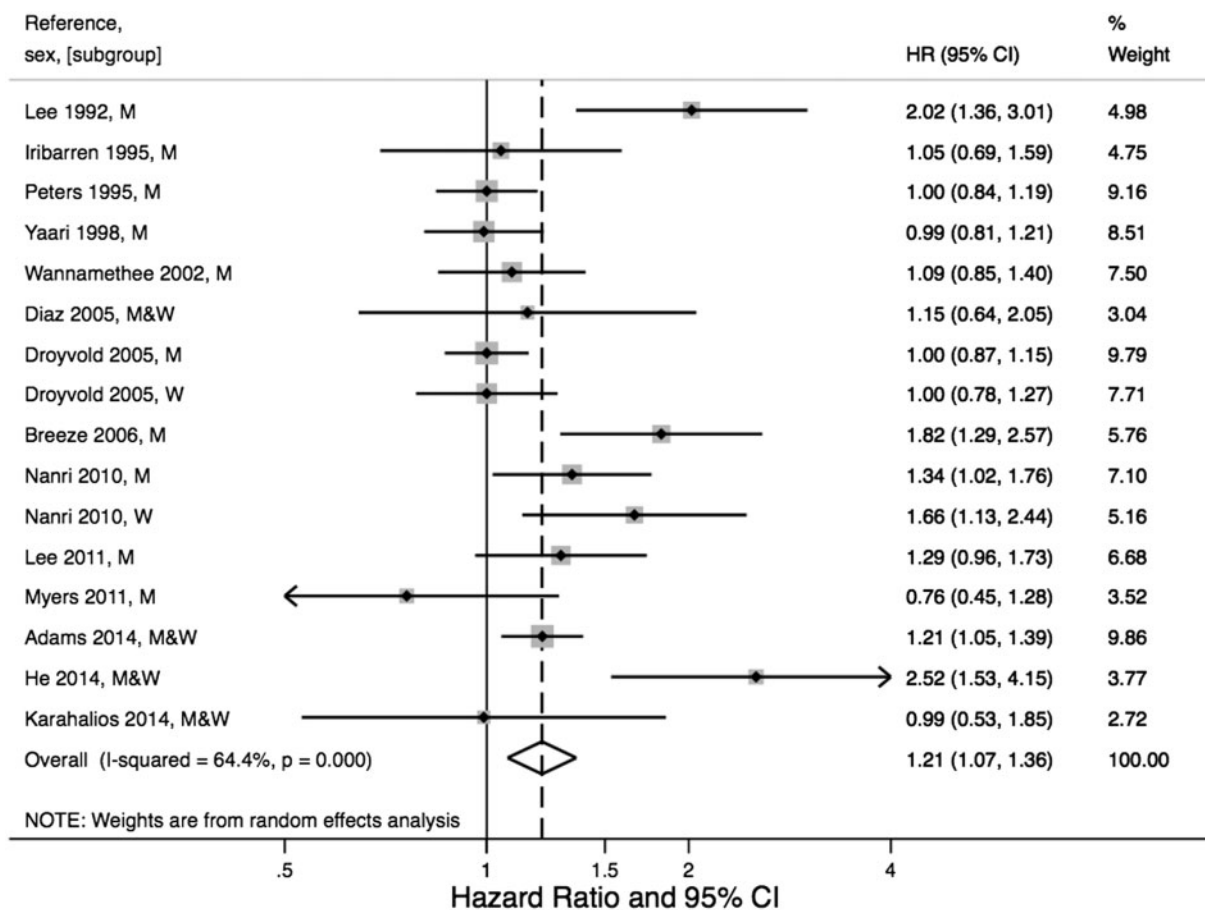

**Figure 3.** Adjusted hazard ratio for the risk of cardiovascular mortality comparing the largest weight gain group to the reference group for males (M), females (W) and both sexes combined, 1992 to 2015; dashed line, overall estimate; bars, 95% confidence interval (CI).

### Risk of bias

We assessed the risk of bias of the included cohort studies against the six domains of bias in the ROBINS-I tool that applied to our study (i.e. bias due to confounding, in selection of participants into the study, in measurement of interventions, due to missing data, in measurement of outcomes and in selection of the reported results). With respect to bias in selection of participants into the study, bias in measurement of outcomes and bias in selection of the reported results, all of the included studies were determined to have a low risk of bias. For the domain of bias due to missing data, all of the studies had a moderate or serious risk of bias. Although the outcome data were reasonably complete for all studies, data were missing for weight change and/or the covariates included in the models. Also, many studies did not differentiate between the amount of data missing for weight change and that missing for the covariates. Bias in measurement of weight change was determined to be low in all except two studies. These two studies relied on recalled weight to assess weight change. Finally, bias due to confounding was determined as serious in all of the studies. We determined a priori that age, sex,

physical activity, smoking status, weight at baseline and weight loss intention were ‘critically important’ confounding domains that should be accounted for the analysis. None of the studies provided information on whether the confounding domains were measured validly or reliably and none of the studies accounted for all of the potential confounding domains.

### Weight gain

We pooled the estimates from 24 papers (providing data from 434 694 participants with 31 978 deaths from all-causes) to estimate the risk of all-cause mortality, comparing the largest weight gain category to a reference group (Table S4, see [Supplementary data](#) available at *IJE* online). Fourteen studies assessed the association with CVD mortality and seven studies assessed the association with cancer mortality (Tables S5 and S6, see [Supplementary data](#) available at *IJE* online). The multivariable-adjusted HRs for each study and all studies combined for all-cause, CVD and cancer mortality are presented in [Figures 2, 3 and 4](#). The pooled estimates for weight gain were slightly elevated

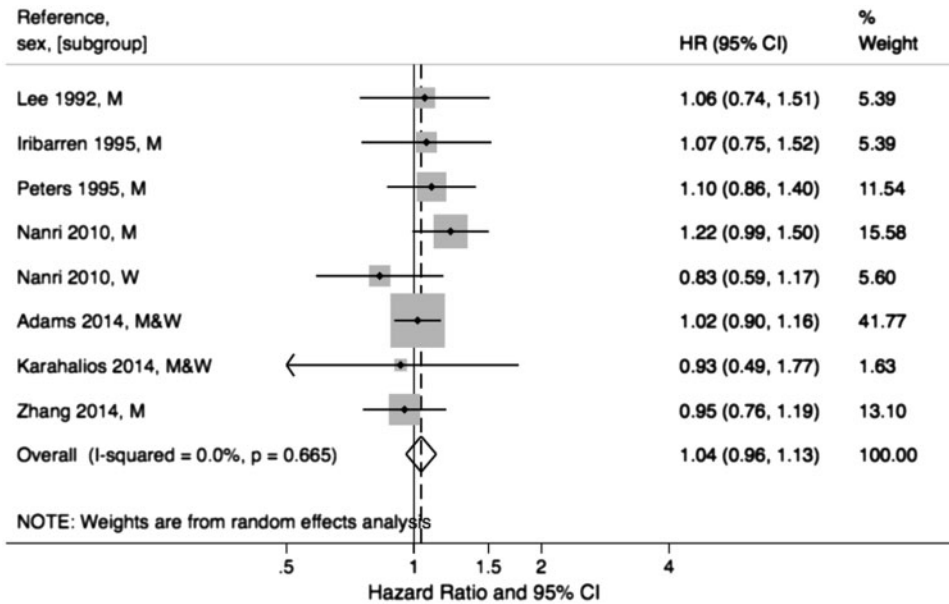

Figure 4. Adjusted hazard ratio for the risk of cancer mortality comparing the largest weight gain group to the reference group for males (M), females (W) and both sexes combined, 1992 to 2015; dashed line, overall estimate; bars, 95% confidence interval (CI).

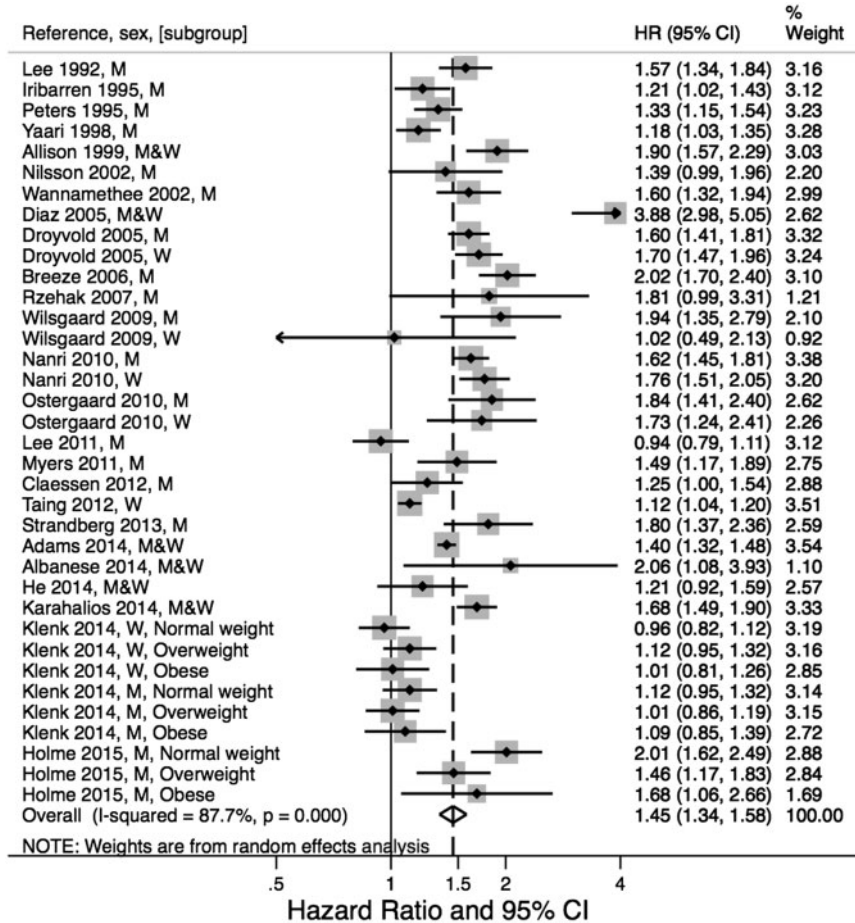

Figure 5. Adjusted hazard ratio for the risk of all-cause mortality comparing the largest weight loss group to the reference group for males (M), females (W) and both sexes combined, 1992 to 2015; dashed line, overall estimate; bars, 95% confidence interval (CI).

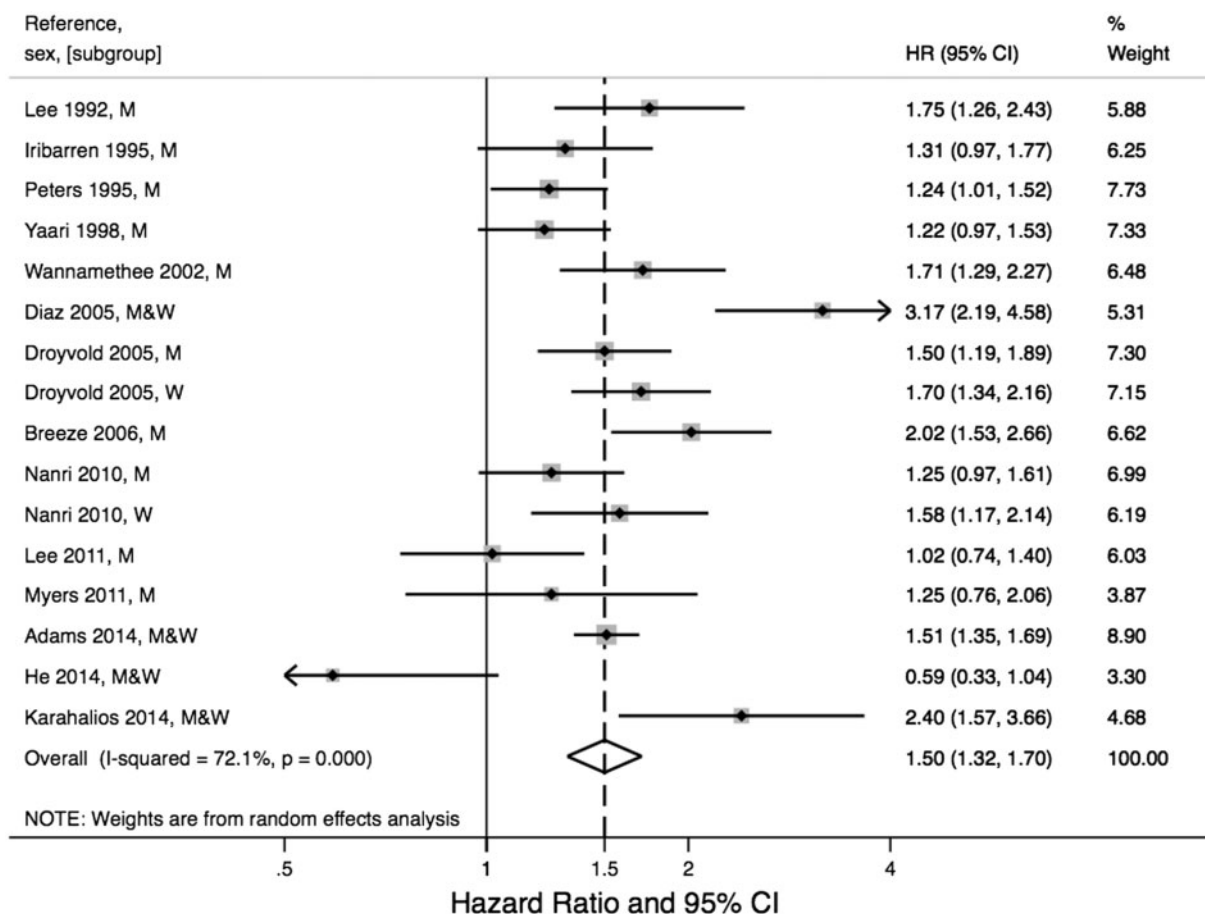

**Figure 6.** Adjusted hazard ratio for the risk of cardiovascular mortality comparing the largest weight loss group to the reference group for males (M), females (W) and both sexes combined, 1992 to 2015; dashed line, overall estimate; bars, 95% confidence interval (CI).

for all-cause, CVD mortality and cancer mortality (HR: 1.07; 95% CI: 1.01, 1.13, HR: 1.21; 95% CI: 1.07, 1.36, HR: 1.04; 95% CI: 0.96, 1.13, respectively).

The funnel plots did not suggest evidence of bias due to small study effects, which was confirmed by Egger's regression asymmetry test ( $p$ -values = 0.20, 0.11, 0.69 for all-cause, CVD and cancer mortality, respectively) (Figures S1a, b and c, see [Supplementary data](#) available at *IJE* online).

There was evidence of heterogeneity for weight gain and all-cause and CVD mortality, (all-cause:  $I^2 = 73.7%$ ,  $P$ -value < 0.001; CVD:  $I^2 = 64.4%$ ,  $P$ -value < 0.001), but not for cancer mortality ( $I^2 = 0.0%$ ,  $P$ -value = 0.665). In the meta-regression analysis of studies assessing weight gain against a reference group for all-cause mortality, the method used to ascertain weight at each wave explained some of the observed heterogeneity ( $\tau^2 = 0.024$  for the model without covariates and  $\tau^2 = 0.016$  with method used to assess weight) (Table 2).

For CVD mortality, the time between weight measurements (i.e. greater/less than 10 years) explained much of the variation ( $\tau^2 = 0.043$  without and 0.018 with) (Table

3). In the univariable meta-regression analysis, studies with more than 10 years between weight measurements had higher HRs than studies with less than 10 years between weight measurements (ratio of HRs for > 10 years = 1.36; 95% CI: 1.06, 1.75).

### Weight loss

We included 25 studies (providing data from 437 772 participants with 34 038 deaths from all-causes) in the meta-analysis of weight loss and all-cause mortality (Table S4, see [Supplementary data](#) available at *IJE* online). Of these, 14 studies assessed the association for CVD mortality and seven with cancer mortality. The multivariable-adjusted HRs for each study and all studies combined are presented in Figure 5, 6 and 7, for all-cause, CVD and cancer mortality, respectively. Comparing weight loss with the reference group, there was an increased risk of all-cause (HR: 1.45; 95% CI: 1.34, 1.58), and CVD mortality (1.50; 1.32, 1.70) and a weaker association with cancer mortality (1.19; 0.97, 1.46).

**Table 4.** Results from meta-regression analyses of weight loss compared with a no-weight-change group and risk of all-cause mortality

| Covariate                                                      | No. of HRs<br>(no. of studies) <sup>a</sup> | Summary HR        | I <sup>2</sup> (%) | tau <sup>2</sup> | Ratio of HRs      | P-value |
|----------------------------------------------------------------|---------------------------------------------|-------------------|--------------------|------------------|-------------------|---------|
| Model with no covariates                                       | 36 (25)                                     | 1.46 (1.32, 1.61) | 87.7               | 0.067            | –                 | –       |
| Sex                                                            |                                             |                   |                    |                  |                   |         |
| Men and women                                                  | 6 (6)                                       | 1.83 (1.45, 2.30) | 86.6               | 0.060            | 1.00              | –       |
| Men                                                            | 22 (18)                                     | 1.44 (1.28, 1.62) | –                  | –                | 0.79 (0.61, 1.02) | 0.071   |
| Women                                                          | 8 (6)                                       | 1.28 (1.05, 1.55) | –                  | –                | 0.70 (0.51, 0.95) | 0.022   |
| Adjusted for physical activity                                 |                                             |                   |                    |                  |                   |         |
| No                                                             | 20 (12)                                     | 1.46 (1.28, 1.67) | 88.0               | 0.070            | 1.00              | –       |
| Yes                                                            | 16 (13)                                     | 1.46 (1.26, 1.69) | –                  | –                | 1.00 (0.82, 1.22) | 0.989   |
| Body size at baseline                                          |                                             |                   |                    |                  |                   |         |
| All                                                            | 34 (23)                                     | 1.47 (1.33, 1.63) | 86.6               | 0.070            | 1.00              | –       |
| Normal weight                                                  | 1 (1)                                       | 1.39 (0.73, 2.65) | –                  | –                | 0.94 (0.49, 1.81) | 0.855   |
| Overweight/obese                                               | 1 (1)                                       | 1.12 (0.65, 1.93) | –                  | –                | 0.76 (0.44, 1.32) | 0.317   |
| Method used to collect<br>weight/BMI at each wave              |                                             |                   |                    |                  |                   |         |
| Measured at baseline<br>and follow-up wave(s)                  | 29 (19)                                     | 1.39 (1.25, 1.55) | 87.4               | 0.064            | 1.00              | –       |
| Measured at baseline,<br>self-reported at<br>follow-up wave(s) | 4 (4)                                       | 1.82 (1.37, 2.40) | –                  | –                | 1.31 (0.97, 1.76) | 0.078   |
| Self-reported at baseline<br>and follow-up wave(s)             | 3 (2)                                       | 1.65 (1.21, 2.25) | –                  | –                | 1.18 (0.85, 1.64) | 0.300   |
| Proportion of baseline sample<br>included in final analysis    |                                             |                   |                    |                  |                   |         |
| < 70%                                                          | 26 (17)                                     | 1.49 (1.32, 1.68) | 88.0               | 0.070            | 1.00              | –       |
| ≥ 70%                                                          | 10 (8)                                      | 1.39 (1.17, 1.67) | –                  | –                | 0.94 (0.76, 1.16) | 0.533   |
| Exposure time                                                  |                                             |                   |                    |                  |                   |         |
| ≤ 10 years                                                     | 24 (15)                                     | 1.34 (1.20, 1.50) | 87.7               | 0.056            | 1.00              | –       |
| > 10 years                                                     | 12 (10)                                     | 1.70 (1.46, 1.98) | –                  | –                | 1.27 (1.05, 1.53) | 0.017   |
| Follow-up time <sup>b</sup>                                    |                                             |                   |                    |                  |                   |         |
| ≤ 10 years                                                     | 19 (11)                                     | 1.47 (1.28, 1.68) | 88.8               | 0.072            | 1.00              | –       |
| > 10 years                                                     | 14 (12)                                     | 1.40 (1.19, 1.65) | –                  | –                | 0.95 (0.77, 1.18) | 0.644   |

<sup>a</sup>Number of studies sum to more than the total because some studies presented separate results for men and women and/or body weight categories.

<sup>b</sup>Two studies did not report follow-up time.

The funnel plots showed little (if any) evidence of bias from small study effects for all-cause mortality (Figures S2a, b and c, see [Supplementary data](#) available at *IJE* online), which was confirmed by Egger's regression asymmetry test ( $P$ -values = 0.18, 0.93, 0.84 for all-cause, CVD and cancer mortality, respectively). There was evidence of heterogeneity for all-cause, CVD and cancer mortality (all-cause:  $I^2 = 87.7\%$ ,  $P$ -value < 0.001; CVD:  $I^2 = 72.1\%$ ,  $P$ -value < 0.001; cancer:  $I^2 = 85.0\%$ ,  $P$ -value < 0.001, respectively).

Meta-regression analyses were performed to investigate between-study heterogeneity for all-cause and CVD mortality (Tables 4 and 5, respectively) but not for cancer mortality because it included only seven studies. The covariates identified a priori explained little of the heterogeneity observed for all-cause mortality; the  $\tau^2$  estimates were

similar to that obtained from the model without any covariates ( $\tau^2 \sim 0.067$  from the meta-regression models) (Table 4). For CVD mortality, the proportion of the baseline sample (i.e. greater/less than 70%) included in the final analysis explained some of the variation ( $\tau^2 = 0.069$  without and 0.038 with) (Table 5). In the univariable meta-regression analysis, studies that included less than 70% of their baseline sample in their final analysis had higher HRs than studies that included more than 70% of their baseline sample in their analysis (ratio of HRs for  $\geq 70\%$ : 0.70; 0.51, 0.95).

### Nonlinear dose-response analysis

Fourteen studies were included in the assessment of a nonlinear dose-response association between weight loss and

**Table 5.** Results from meta-regression analyses of weight loss compared with a no weight change group and risk of cardiovascular disease mortality

| Covariate                                                      | No. of HRs<br>(no. of studies) <sup>a</sup> | Summary HR        | I <sup>2</sup> (%) | tau <sup>2</sup> | Ratio of HRs      | P-value |
|----------------------------------------------------------------|---------------------------------------------|-------------------|--------------------|------------------|-------------------|---------|
| Model with no covariates                                       | 16 (14)                                     | 1.50 (1.25, 1.79) | 72.1               | 0.069            | –                 | –       |
| Sex                                                            |                                             |                   |                    |                  |                   |         |
| Men and women                                                  | 4 (4)                                       | 1.72 (1.16, 2.55) | 73.1               | 0.073            | 1.00              | –       |
| Men                                                            | 10 (10)                                     | 1.40 (1.11, 1.77) | –                  | –                | 0.82 (0.52, 1.29) | 0.355   |
| Women                                                          | 2 (2)                                       | 1.64 (0.98, 2.75) | –                  | –                | 0.96 (0.50, 1.83) | 0.885   |
| Adjusted for physical activity                                 |                                             |                   |                    |                  |                   |         |
| No                                                             | 4 (4)                                       | 1.70 (1.20, 2.42) | 73.9               | 0.075            | 1.00              | –       |
| Yes                                                            | 12 (10)                                     | 1.43 (1.16, 1.77) | –                  | –                | 0.84 (0.56, 1.27) | 0.382   |
| Body size at baseline                                          |                                             |                   |                    |                  |                   |         |
| All                                                            | 16 (14)                                     | 1.50 (1.25, 1.79) | –                  | –                | 1.00              | –       |
| Method used to collect<br>weight/BMI at each wave              |                                             |                   |                    |                  |                   |         |
| Measured at baseline<br>and follow-up wave(s)                  | 11 (10)                                     | 1.40 (1.14, 1.71) | 69.5               | 0.055            | 1.00              | –       |
| Measured at baseline,<br>self-reported at<br>follow-up wave(s) | 2 (2)                                       | 2.27 (1.40, 3.67) | –                  | –                | 1.62 (0.96, 2.74) | 0.066   |
| Self-reported at<br>baseline and follow-up wave(s)             | 3 (2)                                       | 1.50 (1.02, 2.19) | –                  | –                | 1.07 (0.70, 1.65) | 0.727   |
| Proportion of baseline<br>sample included in<br>final analysis |                                             |                   |                    |                  |                   |         |
| < 70%                                                          | 6 (6)                                       | 1.90 (1.48, 2.43) | 66.5               | 0.038            | 1.00              | –       |
| ≥ 70%                                                          | 10 (8)                                      | 1.32 (1.10, 1.58) | –                  | –                | 0.70 (0.51, 0.95) | 0.024   |
| Exposure time                                                  |                                             |                   |                    |                  |                   |         |
| ≤ 10 years                                                     | 10 (8)                                      | 1.37 (1.11, 1.68) | 69.0               | 0.048            | 1.00              | –       |
| > 10 years                                                     | 6 (6)                                       | 1.78 (1.35, 2.36) | –                  | –                | 1.31 (0.92, 1.85) | 0.122   |
| Follow-up time                                                 |                                             |                   |                    |                  |                   |         |
| ≤ 10 years                                                     | 9 (7)                                       | 1.74 (1.42, 2.14) | 67.0               | 0.043            | 1.00              | –       |
| > 10 years                                                     | 7 (7)                                       | 1.25 (1.00, 1.57) | –                  | –                | 0.72 (0.53, 0.97) | 0.035   |

<sup>a</sup>Number of studies sum to more than the total because some studies presented separate results for men and women and/or body weight categories.

weight gain and all-cause mortality. We observed nonlinear associations between weight change and all-cause mortality risk (Figure 8); weight loss of 10 kg and weight gain of 20 kg were both associated with approximately 2-fold increased risks of mortality, whereas weight stability was not found to increase the risk of mortality.

### Sensitivity analyses

The results did not change when we excluded studies that did not adjust for smoking or when excluding studies,<sup>23</sup> studies that adjusted for possible intermediates on the causal pathway.<sup>16–21</sup> Excluding the first 2 to 6 years of follow-up emphasized the association between weight gain and all-cause mortality (HR = 1.15; 1.00, 1.32)<sup>19,25,26</sup> but did not materially change the association between weight loss and all-cause mortality (HR = 1.41; 1.27, 1.57).<sup>16,19,20,25,26</sup>

Two studies presented additional results for the association between intentional weight loss and the risk of all-cause mortality.<sup>20,27</sup> The pooled random-effects estimate from these studies was similar to the estimate from all studies combined (HR = 1.44; 1.03, 2.00).

### Waist circumference change

Only three papers<sup>42–44</sup> reported on the association of increased and/or decreased waist circumference and the risk of all-cause mortality. Berentzen *et al.*<sup>43</sup> did not provide sufficient information to pool their estimate with the other two papers. The pooled HR from the studies by Karahalios 2014<sup>42</sup> and Mousavi 2015<sup>44</sup> was elevated for decreased waist circumference but not for increased waist circumference (decreased waist HR = 1.26; 95% CI: 1.06, 1.49, increased waist HR = 0.92; 95% CI: 0.80, 1.07).



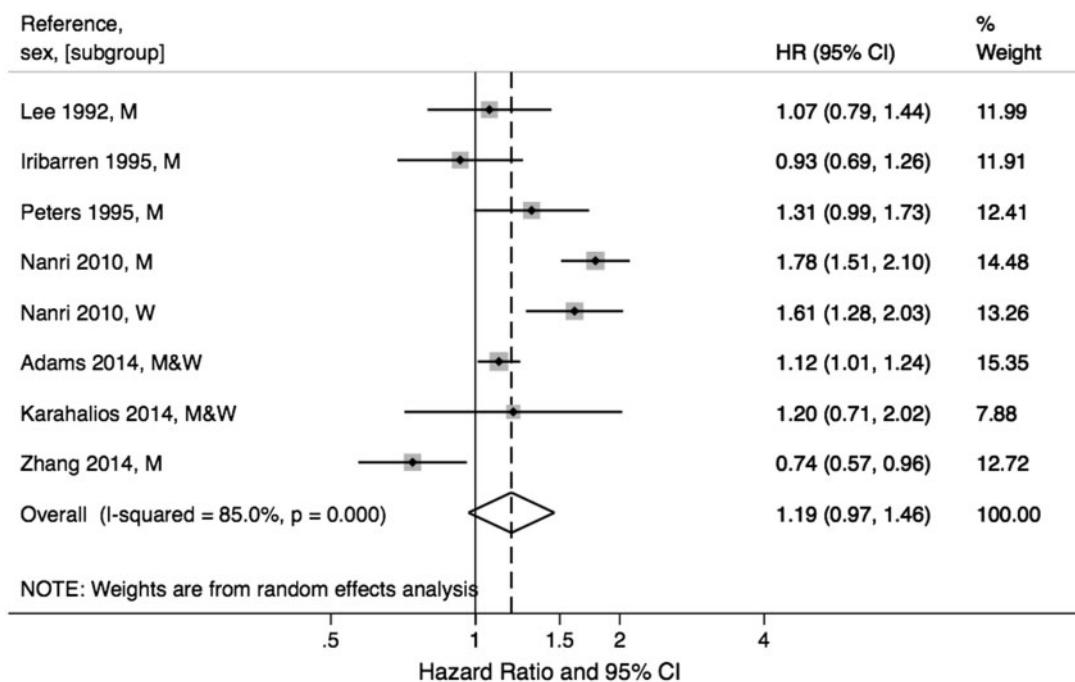

**Figure 7.** Adjusted hazard ratio for the risk of cancer mortality comparing the largest weight loss group to the reference group for males (M), females (W) and both sexes combined, 1992 to 2015; dashed line, overall estimate; bars, 95% confidence interval (CI).

Because only two studies were available, we did not assess bias due to small-study effects, nor did we perform meta-regression analyses.

## Discussion

The findings from this systematic review and meta-analysis of 26 prospective studies of healthy middle-aged adults showed that weight loss and weight gain were associated with an increased risk of all-cause and CVD mortality, with a much stronger association observed for weight loss than for weight gain (HR for loss and all-cause mortality = 1.45, HR for gain and all-cause mortality = 1.07, HR for loss and CVD mortality = 1.50, HR for gain and CVD mortality = 1.21). There were slightly, non-statistically significant, increased risks of cancer mortality associated with weight loss and weight gain (HR for loss = 1.19, HR for gain = 1.04).

These results are broadly consistent with a previous meta-analysis<sup>4</sup> which included studies assessing weight loss from early adulthood (i.e. age 18 or 21) to midlife in addition to weight loss from midlife to older age. Harrington *et al.*<sup>4</sup> found an increased risk of all-cause mortality for intentional and unintentional weight loss for healthy participants (HR = 1.11; 95% CI: 1.00, 1.22 and HR = 1.27; 95% CI: 1.09, 1.47, respectively); the association between weight gain and all-cause mortality was not assessed.

In this review, studies that investigated weight gain or weight loss from early adulthood to middle age were

excluded, as the primary focus was weight gain and weight loss from middle age to older age. With age, muscle mass decreases and fat mass increases, with the largest increases in the proportion of visceral and abdominal fat.<sup>3</sup> This change in body composition from midlife to older age suggests that there might be a different mechanism associated with change in body size from early adulthood to midlife, than for change from midlife to older age.<sup>2</sup>

Increases in fat mass with corresponding decreases in muscle mass can lead to sarcopenia in older adults, leading some authors to suggest that weight loss in older age is dangerous.<sup>45</sup> Waist circumference is thought to be a better marker of abdominal or central fat mass than weight.<sup>46</sup> We intended to assess the association between increase and decrease in waist circumference and mortality. However, only two studies presented results for this association. Further research into the associations between gains/losses in fat mass and/or muscle mass, measured by waist circumference, or bioelectrical impedance, and mortality would elucidate these associations.

The method used to ascertain body measurements might lead to bias; self-reported weight data have been shown to vary by sex, age and body size (i.e. lighter participants might overestimate their weight and heavier participants might underestimate their weight), which can lead to upward bias.<sup>47,48</sup> Consistent with other studies of anthropometric measurements, the meta-regression analysis showed that studies using self-reported measures of weight at baseline and at the follow-up wave(s) had higher HRs

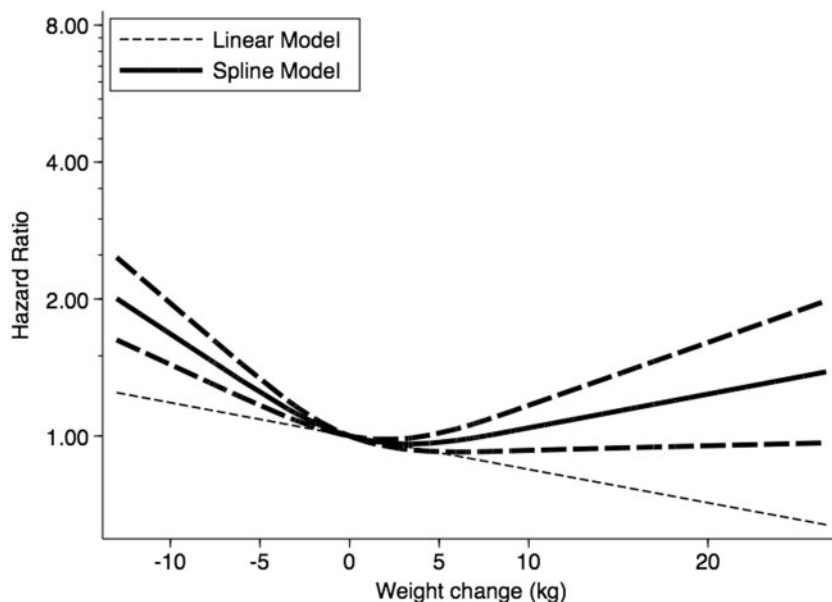

**Figure 8.** Adjusted hazard ratio of all-cause mortality associated with weight loss and weight gain in a meta-analysis of published studies. The y-axis is on a log scale. Bold line, spline model; long dashed line, upper and lower confidence limits of spline model; short dashed line, linear model.

than studies that measured weight (ratio of HRs = 1.41; 0.97, 2.05 for weight gain and CVD mortality).<sup>49</sup>

In this meta-analysis of weight/BMI change from middle age to older age, we assumed that the height of the participants is changing minimally. Given this, BMI change amounts to a change in weight, and we included both BMI change and weight change in our pooled estimates.

Baseline body weight might modify the association between weight gain/loss and the risk of mortality. None of the studies included participants who were underweight at baseline. As well we, a priori, selected body size at baseline as a covariate in our meta-regression analysis. However, this meta-regression analysis was limited since the majority of studies ( $n = 23$ ) only reported results for normal weight, overweight and obese people combined. Only three studies provided estimates for participants with normal weight and three studies provided estimates for overweight/obese participants. From the meta-regression analysis, studies that presented results for normal weight participants or overweight/obese participants gave similar HRs to studies that presented results for all participants combined (ratio of HRs for normal weight participants compared with all participants: 0.93; 95% CI: 0.76, 1.14 and ratio of HRs for overweight/obese participants compared with all participants: 0.94; 0.77, 1.14 for weight gain and all-cause mortality). Future observational studies should assess whether body size at baseline modifies the association and present the results accordingly.

One of the main criticisms of cohort studies assessing the association between weight loss and mortality is that

the participants are not asked about their intention to lose weight. Unintentional weight loss might reflect an underlying disease, resulting in excess mortality, whereas intentional weight loss is assumed to be beneficial, because obesity is associated with increased mortality. In our protocol, we stated that meta-regression analysis by intentionality of weight loss would be conducted. However, the 26 studies that were included in our meta-analysis did not differentiate between intentional and unintentional weight loss in their primary analysis. Two studies<sup>20,27</sup> presented additional estimates by weight loss intention. We pooled the estimates of intentional weight loss from these two studies and found that the pooled estimate was similar to our overall estimate for weight loss and the risk of all-cause mortality. In 2015, Kritchevsky *et al.*<sup>50</sup> published a systematic review and meta-analysis of randomized controlled trials that assessed the effect of intentional weight loss on mortality for obese adults. Pooling the estimates from 12 trials, the authors reported a 15% reduction in all-cause mortality for participants randomized to the weight loss intervention group (RR = 0.85; 95% CI: 0.73, 1.00). Future work that identifies whether weight loss intention modifies the association between weight loss and mortality is necessary to better understand the underlying pathways.

We would expect the associations between weight change and cancer to be different for obesity-related cancers and other cancers. However, it was not possible to explore this further because none of the included studies restricted their analysis to obesity-related cancers nor did

they present separate summary estimates for obesity-related cancers.

To our knowledge, one additional study has been published since 5 September 2015. Klingberg *et al.* 2015<sup>51</sup> examined the association between increased waist circumference over a 6-year period and all-cause and cardiovascular disease mortality using data from the Danish monitoring trends and determinants of cardiovascular disease study and the Swedish Prospective Study of Women in Gothenburg. Up to 5 September 2015, only three studies were published looking at the results of change in waist circumference and the risk of mortality; we pooled the data from two of these studies.<sup>42,44</sup> In line with the pooled estimate for decreased waist circumference (HR = 1.25; 95% CI: 1.06, 1.49), Klingberg *et al.*<sup>51</sup> found an increased, but non-statistically significant, risk of all-cause mortality associated with a decreased waist circumference of more than 0.9 cm (HR = 1.22; 95% CI: 0.93, 1.61). In contrast to the pooled estimate for increased waist circumference (HR = 0.91; 95% CI: 0.80, 1.07), Klingberg *et al.*<sup>51</sup> found a gain in waist circumference of more than 8.1 cm increased the risk of all-cause mortality (HR = 1.72; 95% CI: 1.28, 2.31). Klingberg *et al.*<sup>51</sup> presented results for women only and Mousavi *et al.*<sup>44</sup> focussed on men, whereas Karahalios *et al.*<sup>42</sup> presented results for both sexes combined.

### Strengths and limitations

A comprehensive search strategy was used to identify studies for this meta-analysis, resulting in a large number of studies. This made our findings robust to the estimates presented in a single study. Also, a broad search strategy was used to identify studies looking at increased and decreased waist circumference in addition to weight change.

To explore sources of heterogeneity, we used meta-regression with specific pre-specified covariates and sensitivity analyses as recommended.<sup>7</sup> This is preferable to constructing quality scores, which might lack validity, and which might not be associated with study results.<sup>52,53</sup> However, meta-regression is not without its limitations. Meta-regression analysis with few studies is unlikely to be useful and residual heterogeneity is likely. Further, the results of a meta-regression analysis are easier to interpret when there is little within-study variability and large between-study variability.<sup>54</sup>

Our pooled estimates were derived from observational studies and therefore the study-specific estimates might be biased due to residual confounding. All studies controlled for age. The majority of studies ( $n = 18$ ) adjusted for baseline weight or body mass index, whereas only 14 studies adjusted for physical activity. A comparison of studies that adjusted for physical activity with those that did not, found

that the results did not materially change; however, other unmeasured factors might still bias the results. To investigate reverse causation, we performed a sensitivity analysis where we pooled the estimates that excluded the first 2 to 6 years of follow-up. Although the association between weight loss and mortality did not materially change, only five studies were available for this analysis.<sup>16,19,20,25,26</sup> We recommend that future studies assess the potential for reverse causation and present a sensitivity analysis where the association excludes the first 5 years of follow-up.

Our review focused on the weight status of participants. However, physical fitness is associated with functional independence, independently of weight status.<sup>55,56</sup> This suggests that physical fitness might be a better indicator of health, and a systematic review with a meta-analysis of the associations between change in fitness levels and mortality in middle-aged adults might be beneficial.

This review has other limitations. To combine the results of the estimated HRs for each category of weight gain or loss, we were limited to the findings presented in each paper. Most studies present change categories corresponding to greater or less than  $\pm 3$  to 5 kg. However, some studies present results for changes of greater or less than  $\pm 1$  kg, and other studies present results for quintiles or other categories of change. In order to avoid the correlation induced by including multiple subgroups from the same study, we chose the largest category of gain/loss to include in the meta-analyses; this broadly corresponded to changes of more than 3 to 5 kg and allowed us to estimate the associations with large weight gain or loss. Furthermore, the time interval between body size measurements varied greatly from 5 to 29 years across the studies, and therefore for studies with a large time interval (e.g. two studies with interval of 20+ years<sup>30,35</sup>) it is not possible to conjecture if the weight gain/loss occurred in midlife or later life. Exploration, using meta-regression, to assess the influence of exposure time interval on study findings found little evidence of this study covariate modifying the results.

Three outcomes were chosen a priori for this review: all-cause, cancer and CVD mortality. Only seven of the 26 studies presented findings for cancer mortality, making it difficult to interpret the results of the meta-analysis, which could be sensitive to the results of a single study.

Observational studies have the potential to be biased according to at least one of the domains presented in the ROBINS-I tool. The studies included in our analysis were deemed to present a low risk of bias due to measurement of the outcome (i.e. mortality), selection of the reported results and selection of participants into the study. However, bias due to confounding and bias in measurement of the weight change was thought to be at least moderate in all

studies. This is the highest level of evidence possible, given that it is not possible to randomize healthy participants to weight gain or weight loss.

Finally, a pooled analysis of individual participant data from the available cohort studies, such as the one carried out by Cohen *et al.* 2014<sup>57</sup> for body mass index and mortality, would enable a comprehensive analysis of the association between weight change and mortality, and allow for the investigation of potential effect modifiers of this association.

In summary, we found that weight loss and weight gain were associated with an increased risk of all-cause and CVD mortality. These observational data suggest weight stability from middle age; however, further research investigating effect modification by obesity status is warranted. We found only three studies that assessed the association between increase or decrease in waist circumference or fat mass from midlife to older age, and one additional study has since been published. Many large cohort studies were established in the 1990s and have since followed-up their participants to ascertain repeated measures of waist circumference and fat mass; forthcoming accumulated evidence from these studies will further the understanding of how change in lean and fat mass is associated with all-cause and cause-specific mortality.

## Supplementary Data

Supplementary data are available at *IJE* online.

## Funding

A.K. was the recipient of an Australian Postgraduate Award Scholarship. J.A.S. is funded by a National Health and Medical Research Council (NHMRC) Senior Research Fellowship 1104975.

**Conflict of interest:** None declared.

## References

1. Willett WC, Dietz WH, Colditz GA. Guidelines for healthy weight. *N Engl J Med* 1999;**341**:427–34.
2. Ferrucci L, Alley D. Obesity, disability, and mortality: a puzzling link. *Arch Int Med* 2007;**167**:750–51.
3. Fontana L, Hu FB. Optimal body weight for health and longevity: bridging basic, clinical, and population research. *Aging Cell* 2014;**13**:391–400.
4. Harrington M, Gibson S, Cottrell RC. A review and meta-analysis of the effect of weight loss on all-cause mortality risk. *Nutr Res Rev* 2009;**22**:93–108.
5. Simonsen MK, Hundrup YA, Obel EB, Gronbaek M, Heitmann BL. Intentional weight loss and mortality among initially healthy men and women. *Nutr Rev* 2008;**66**:375–86.
6. Janssen I, Mark AE. Elevated body mass index and mortality risk in the elderly. *Obes Rev* 2007;**8**:41–59.

7. Stroup DF, Berlin JA, Morton SC *et al.* Meta-analysis of observational studies in epidemiology: a proposal for reporting. Meta-analysis Of Observational Studies in Epidemiology (MOOSE) group. *JAMA* 2000;**283**:2008–12.
8. Karahalios A, English DR, Simpson JA. Change in weight and waist circumference and mortality: a review and meta-analysis. PROSPERO 2014:CRD42014015627. [http://www.crd.york.ac.uk/PROSPERO/display\\_record.asp?ID=CRD42014015627](http://www.crd.york.ac.uk/PROSPERO/display_record.asp?ID=CRD42014015627). (8 October 2015, date last accessed).
9. Huwaldt J, Steinhilber S. *Plot Digitizer* 2.6.3. July 2013. [https://sourceforge.net/projects/plotdigitizer/files/plotdigitizer/2.6.6/\(20 July 2013, date last accessed\)](https://sourceforge.net/projects/plotdigitizer/files/plotdigitizer/2.6.6/(20%20July%202013,%20date%20last%20accessed).).
10. Egger M, Davey Smith G, Schneider M, Minder C. Bias in meta-analysis detected by a simple, graphical test. *BMJ* 1997;**315**:629–34.
11. Higgins JPT, Thompson SG. Quantifying heterogeneity in a meta-analysis. *Stat Med* 2002;**21**:1539–58.
12. Orsini N, Li R, Wolk A, Khudyakov P, Spiegelman D. Meta-analysis for linear and nonlinear dose-response relations: examples, an evaluation of approximations, and software. *Am J Epidemiol* 2012;**175**:66–73.
13. Harrell FE, Lee KL, Pollock BG. Regression models in clinical studies: determining relationships between predictors and response. *J Natl Cancer Inst* 1988;**80**:1198–202.
14. Orsini N, Bellocco R, Greenland S *et al.* Generalized least squares for trend estimation of summarized dose-response data. *Stata J* 2006;**6**:40.
15. Il'yasova D, Hertz-Picciotto I, Peters U, Berlin JA, Poole C. Choice of exposure scores for categorical regression in meta-analysis: a case study of a common problem. *Cancer Causes Control* 2005;**16**:383–88.
16. Droyvold WB, Nilsen TIL, Lydersen S *et al.* Weight change and mortality: the Nord-Trøndelag Health Study. *J Intern Med* 2005;**257**:338–45.
17. Holme I, Tonstad S. Survival in elderly men in relation to midlife and current BMI. *Age Ageing* 2015;**44**:434–39.
18. Lee DC, Sui X, Artero EG *et al.* Long-term effects of changes in cardiorespiratory fitness and body mass index on all-cause and cardiovascular disease mortality in men: the Aerobics Center Longitudinal Study. *Circulation* 2011;**124**:2483–90.
19. Nanri A, Mizoue T, Takahashi Y *et al.* Weight change and all-cause, cancer and cardiovascular disease mortality in Japanese men and women: The Japan Public Health Center-Based Prospective Study. *Int J Obes (Lond)* 2010;**34**:348–56.
20. Yaari S, Goldbourt U. Voluntary and involuntary weight loss: associations with long term mortality in 9,228 middle-aged and elderly men. *Am J Epidemiol* 1998;**148**:546–55.
21. Zhang P, Sui X, Hand GA, Hebert JR, Blair SN. Association of changes in fitness and body composition with cancer mortality in men. *Med Sci Sports Exerc* 2014;**46**:1366–74.
22. Myers J, Lata K, Chowdhury S *et al.* The obesity paradox and weight loss. *Am J Med* 2011;**124**:924–30.
23. Nilsson PM, Nilsson JA, Hedblad B, Berglund G, Lindgarde F. The enigma of increased non-cancer mortality after weight loss in healthy men who are overweight or obese. *J Intern Med* 2002;**252**:70–78.

24. He Y, Lam TH, Jiang B *et al.* Changes in BMI before and during economic development and subsequent risk of cardiovascular disease and total mortality: a 35-year follow-up study in China. *Diabetes Care* 2014;**37**:2540–47.
25. Iribarren C, Sharp DS, Burchfiel CM, Petrovitch H. Association of weight loss and weight fluctuation with mortality among Japanese American men. *N Engl J Med* 1995;**333**:686–92.
26. Peters ET, Seidell JC, Menotti A *et al.* Changes in body weight in relation to mortality in 6441 European middle-aged men: the Seven Countries Study. *Int J Obes Relat Metab Disord* 1995;**19**:862–68.
27. Wilsgaard T, Jacobsen BK, Mathiesen EB, Njolstad I. weight loss and mortality: a gender-specific analysis of the Tromsø Study. *Gender Med* 2009;**6**:575–86.
28. StataCorp. *Stata Statistical Software: Release 13* 2013. College Station, TX: Statacorp, 2013.
29. Albanese E, Strand BH, Guralnik JM *et al.* Weight loss and premature death: The 1946 British Birth Cohort Study. *PLoS One* 2014;**9**:e86282.
30. Breeze E, Clarke R, Shipley MJ, Marmot MG, Fletcher AE. Cause-specific mortality in old age in relation to body mass index in middle age and in old age: Follow-up of the Whitehall cohort of male civil servants. *Int J Epidemiol* 2006;**35**:169–78.
31. Claessen H, Brenner H, Drath C, Arndt V. Repeated measures of body mass index and risk of health related outcomes. *Eur J Epidemiol* 2012;**27**:215–24.
32. Klenk J, Rapp K, Ulmer H, Concin H, Nagel G. Changes of body mass index in relation to mortality: Results of a cohort of 42,099 adults. *Plos One* 2014;**9**:84817.
33. Ostergaard JN, Gronbaek M, Schnohr P, Sorensen TI, Heitmann BL. Combined effects of weight loss and physical activity on all-cause mortality of overweight men and women. *Int J Obes (Lond)* 2010;**34**:760–69.
34. Rzehak P, Meisinger C, Woelke G *et al.* Weight change, weight cycling and mortality in the ERFORT Male Cohort Study. *Eur J Epidemiol* 2007;**22**:665–73.
35. Strandberg TE, Stenholm S, Strandberg AY *et al.* The obesity paradox, frailty, disability, and mortality in older men: A prospective, longitudinal cohort study. *Am J Epidemiol* 2013;**178**:1452–60.
36. Wannamethee SG, Shaper AG, Walker M. Weight change, weight fluctuation, and mortality. *Arch Intern Med* 2002;**162**:2575–80.
37. Adams KF, Leitzmann MF, Ballard-Barbash R *et al.* Body mass and weight change in adults in relation to mortality risk. *Am J Epidemiol* 2014;**179**:135–44.
38. Allison DB, Zannolli R, Faith MS *et al.* Weight loss increases and fat loss decreases all-cause mortality rate: Results from two independent cohort studies. *Int J Obes (Lond)* 1999;**23**:603–11.
39. Diaz VA, Mainous Iii AG, Everett CJ. The association between weight fluctuation and mortality: Results from a population-based cohort study. *J Community Health* 2005;**30**:153–65.
40. Lee IM, Paffenbarger JRS. Change in body weight and longevity. *JAMA* 1992;**268**:2045–49.
41. Taing KY, Ardern CI, Kuk JL. Effect of the timing of weight cycling during adulthood on mortality risk in overweight and obese postmenopausal women. *Obesity* 2012;**20**:407–13.
42. Karahalios A, Simpson JA, Baglietto L *et al.* Change in body size and mortality: Results from the Melbourne Collaborative cohort study. *PLoS One* 2014;**9**:e99672.
43. Berentzen TL, Jakobsen MU, Halkjaer J *et al.* Changes in waist circumference and mortality in middle-aged men and women. *PLoS One* 2010;**5**:e13097.
44. Mousavi SV, Mohebi R, Mozaffary A *et al.* Changes in body mass index, waist and hip circumferences, waist to hip ratio and risk of all-cause mortality in men. *Eur J Clin Nutr* 2015;**69**:927–32.
45. Brown R, Kuk J. Consequences of obesity and weight loss: a devil's advocate position. *Obes Rev* 2015;**16**:77–87.
46. Rankinen T, Kim S, Perusse L, Despres J, Bouchard C. The prediction of abdominal visceral fat level from body composition and anthropometry: ROC analysis. *Int J Obes (Lond)* 1999;**23**:801–09.
47. Perry GS, Byers TE, Mokdad AH, Serdula MK, Williamson DF. The validity of self-reports of past body weights by US adults. *Epidemiology* 1995;**6**:61–66.
48. Chioloro A, Peytremann-Bridevaux I, Paccaud F. Associations between obesity and health conditions may be overestimated if self-reported body mass index is used. *Obes Rev* 2007;**8**:373–74.
49. Flegal KM, Kit BK, Graubard BI. Overweight, obesity, and all-cause mortality—reply. *JAMA* 2013;**309**:1681–82.
50. Kritchevsky SB, Beavers KM, Miller ME *et al.* Intentional weight loss and all-cause mortality: a meta-analysis of randomized clinical trials. *PLoS One* 2015;**10**:e0121993.
51. Klingberg S, Mehlig K, Lanfer A *et al.* Increase in waist circumference over 6 years predicts subsequent cardiovascular disease and total mortality in Nordic women. *Obesity (Silver Spring)* 2015;**23**:2123–30.
52. Greenland S. Invited commentary: a critical look at some popular meta-analytic methods. *Am J Epidemiol* 1994;**140**:290–96.
53. Jüni P, Witschi A, Bloch R, Egger M. The hazards of scoring the quality of clinical trials for meta-analysis. *JAMA* 1999;**282**:1054–60.
54. Thompson SG, Higgins JPT. How should meta-regression analyses be undertaken and interpreted? *Stat Med* 2002;**21**:1559–73.
55. Barry VW, Baruth M, Beets MW *et al.* Fitness vs. fatness on all-cause mortality: A meta-analysis. *Prog Cardiovasc Dis* 2014;**56**:382–90.
56. Sardinha LB, Cyrino ES, dos Santos L, Ekelund U, Santos DA. Fitness but not weight status is associated with projected physical independence in older adults. *Age (Dordr)* 2016;**38**:54.
57. Cohen SS, Park Y, Signorello LB *et al.* A pooled analysis of body mass index and mortality among African Americans. *PLoS One* 2014;**9**:e111980.
